# Supplementary material for: Loss of RNA expression and allele-specific expression associated with congenital heart disease
Source: PubMed Central journal article supplement (PMC5052634; doi:10.1038/ncomms12824), 2016-09-27
Supplement: ncomms12824-s1.pdf [file ncomms12824-s1.pdf]

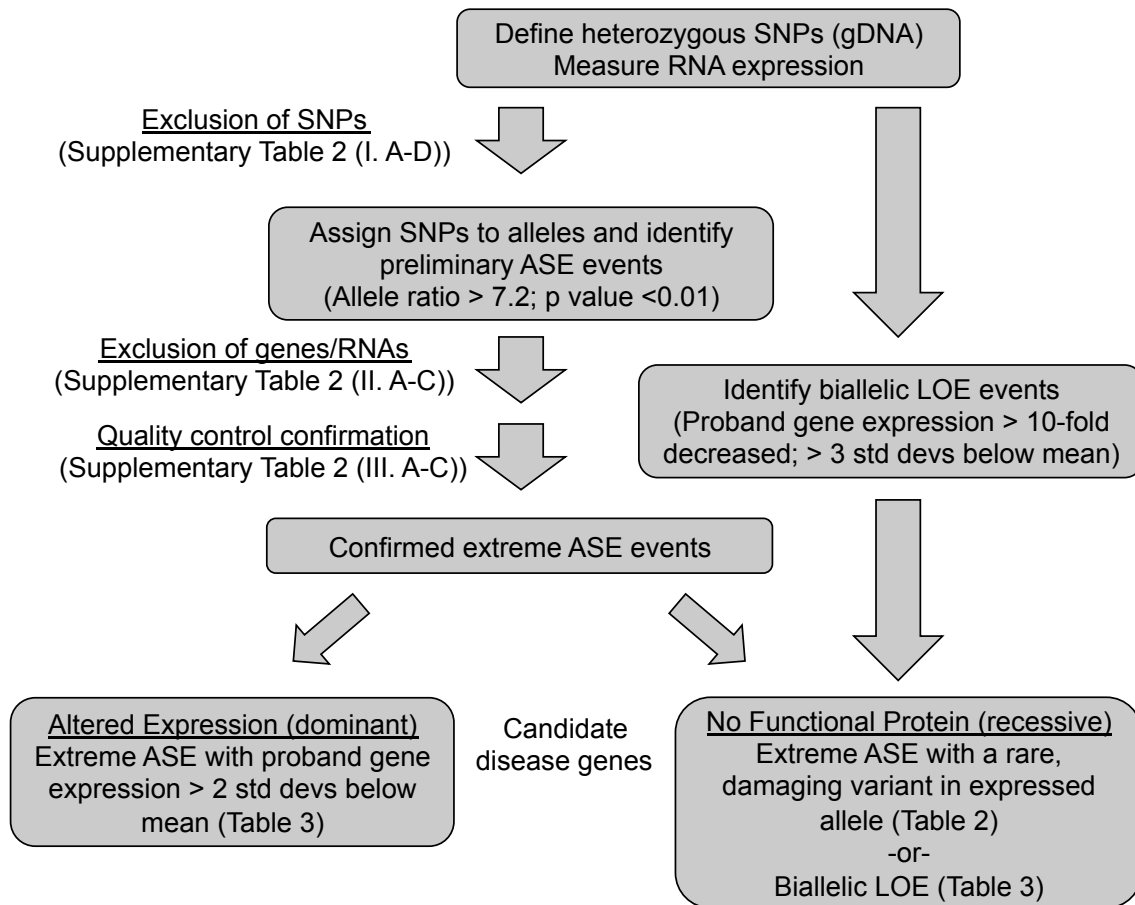

### Supplementary Figure 1: Extreme ASE calling flowchart

RNAseq read counts were tallied at all heterozygous SNPs identified in the genomic DNA. Extensive SNP filtering was performed to exclude low quality SNPs, SNPs in alternatively spliced exons, SNPs with expected alignment biases, and SNPs that are repeatedly biased in multiple subjects. SNPs that passed these filters were then assigned to alleles, and a compound allele ratio and ASE p value was calculated for each gene. Preliminarily called ASE events (compound allele ratio  $> 7.2$ ; ASE p value  $< 0.01$ ; Bonferroni corrected binomial distribution) were then filtered to exclude noncoding genes, genes typically associated with ASE (ChrX genes, HLA- genes, known imprinted genes, and genes with ASE in  $>5\%$  of subjects including at least one control subject (Supplementary Table 4)), genes harboring misaligned reads and genes with low fetal heart expression (Supplementary Table 5). Extreme ASE genes were then subjected to quality controls (manual inspection using the Integrated Genomic Viewer, confirmation that ASE exists in the fastq (unaligned) sequencing reads, and independent confirmation by Sanger sequencing. Filters used to exclude SNPs and genes/RNAs, as well as quality control confirmation are described in detail in Methods, and Supplementary Table 2 reports the number of SNPs and ASE events that were excluded per filter per subject. ASE genes with significantly altered expression or those that had a rare damaging variant in the expressed allele were deemed candidate disease genes.

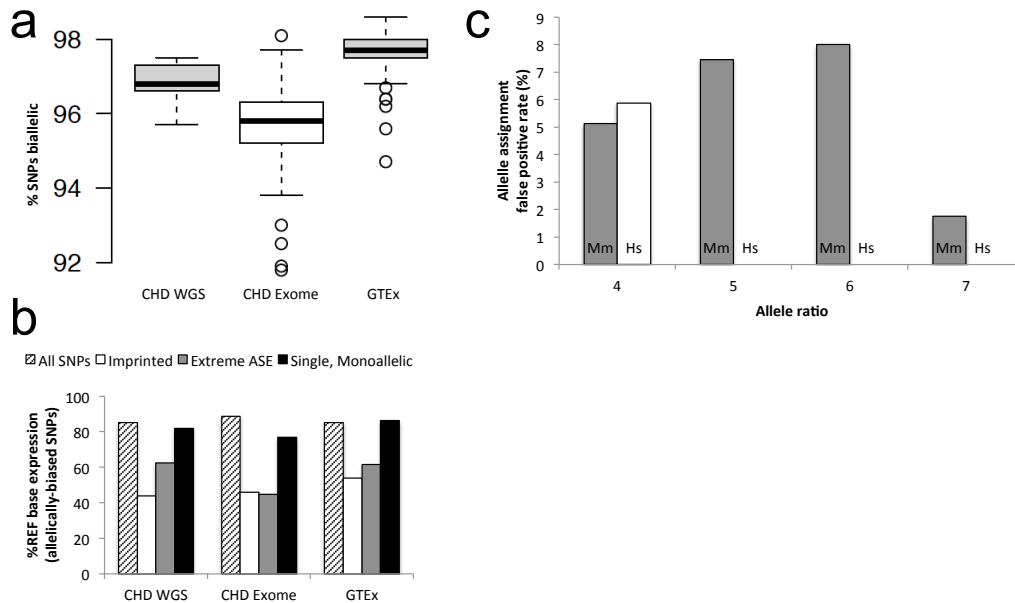

### Supplementary Figure 2: Quality control of ASE calling algorithm

Genotyping and RNAseq data is highly concordant (a) as measured by determining the percent of heterozygous SNP positions that have biallelic expression (excluding SNPs with fewer than 10 RNAseq reads, SNPs on chromosome X, SNPs in alternatively spliced exons and SNPs in known or predicted imprinted genes). Box plots indicate the percent of SNPs with biallelic expression for CHD Exome (n=130) and CHD WGS (n=14) probands and GTEx donors (n=95). Standard deviations are indicated. Panel (b) shows that unfiltered allelically-biased SNPs have higher reference base expression at >80% of SNPs (hatched bars), indicating likely alignment biases. SNPs in cardiovascular imprinted genes (white bars) and extreme ASE SNPs (gray bars) are unbiased (i.e. reference base expression of allelically-biased SNPs approaches 50%). Genes that contain a single, “heterozygous” SNP with 100% monoallelic expression have a strong reference base expression bias (black bars), and are filtered out, due to a suspicious genotype. Panel (c) shows the false positive rate of calling ASE genes due to allele assignment of SNPs when phasing is not known. ASE genes were called on 1 out of every 18 F1 hybrid C57Bl6/Castaneus mouse SNPs (to more closely approximate human data, Supplementary Table 3) or on three human CHD subjects who were genotyped (along with their parents) by WGS. Fraction of false positive events were calculated as the difference in the number of ASE genes called in unphased data versus phased data, divided by the number of ASE genes called in phased data. False positive rates were generated for a minimum allele ratio of 4, 5, 6 and 7. The mouse (gray bars) and human (white bars) false positive rates are indicated; human false positive rate is 0 with a minimum allele ratio of 5 or greater.

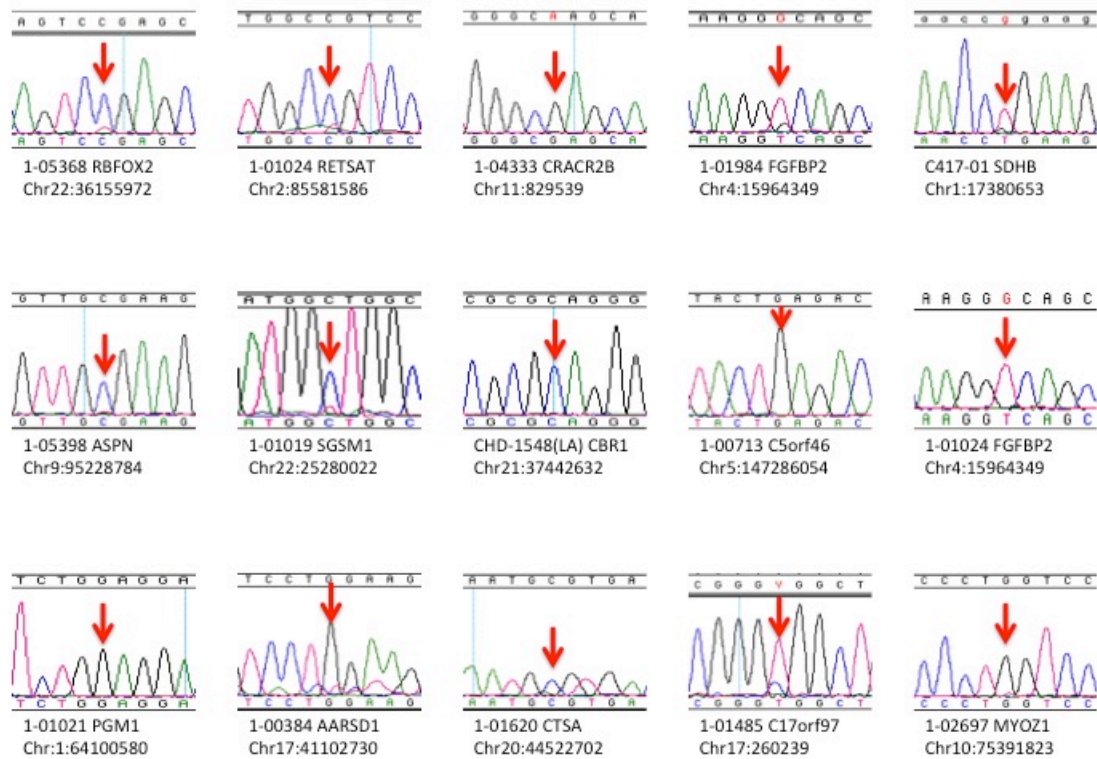

### Supplementary Figure 3: ASE events confirmed by Sanger sequencing

Sanger sequencing traces of allelically-biased SNPs and eight surrounding nucleotides from extreme ASE events (shown are ASE events from Tables 2 and 3 only). For each trace, the subject, gene and chromosomal position are indicated.

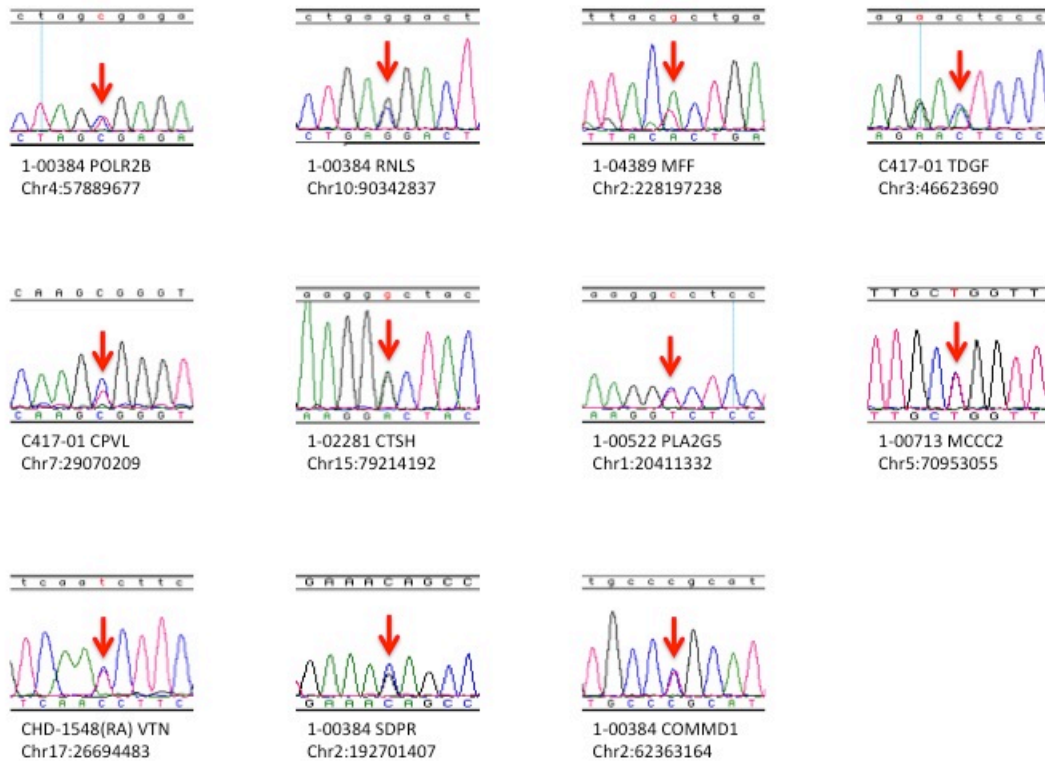

**Supplementary Figure 4: False positive ASE events rejected by Sanger sequencing**  
 Sanger sequencing traces of biallelically expressed SNPs and eight surrounding nucleotides from preliminarily called extreme ASE events. For each trace, the subject, gene and chromosomal position are indicated.

Supplementary Table 1: Number of different tissue samples, mean number of genes expressed per tissue per subject and mean number of expressed genes with at least one heterozygous SNP

| <b>Tissue</b>                  | <b>Tissue Abbrev.</b> | <b>No of samples</b> | <b>Genes Expressed/ subject<sup>a</sup></b> | <b>Genes Het/ subject<sup>b</sup></b> |
|--------------------------------|-----------------------|----------------------|---------------------------------------------|---------------------------------------|
| Aorta                          | AO                    | 8                    | 15820.78                                    | 4062.78                               |
| Aortic valve                   | AoValve               | 2                    | 15429.50                                    | 3543.50                               |
| Atrial septum                  | AtrSpt                | 6                    | 15537.33                                    | 3917.50                               |
| Ductus arteriosus              | DuctArt               | 16                   | 15620.76                                    | 3942.53                               |
| Interventricular septum        | IVS                   | 7                    | 14938.00                                    | 3998.29                               |
| Left atrium                    | LA                    | 5                    | 15599.75                                    | 3551.25                               |
| Left ventricle                 | LV                    | 13                   | 15128.38                                    | 4046.38                               |
| Left ventricular outflow tract | LVOT                  | 1                    | 15997.00                                    | 2865.00                               |
| Papillary                      | Papillary             | 1                    | 16406.00                                    | 3451.00                               |
| Pulmonary artery               | PA                    | 12                   | 15883.36                                    | 3917.07                               |
| Pulmonary valve                | PV                    | 5                    | 15967.71                                    | 4453.29                               |
| Right atrium                   | RA                    | 50                   | 15488.92                                    | 3958.30                               |
| Right ventricle                | RV                    | 42                   | 15159.86                                    | 3817.43                               |
| Sub-aortic membrane            | SubAoMembr            | 2                    | 17651.00                                    | 3676.00                               |
| Unknown atrial                 | UnkAtrial             | 1                    | 15231.00                                    | 2616.00                               |
| Unknown cardiac muscle         | UnkCardMusc           | 1                    | 16376.00                                    | 3688.00                               |

<sup>a</sup>Average number of genes with expression > 2rpm (reads per million aligned reads)

<sup>b</sup>Average number of expressed genes containing heterozygous SNPs

Supplementary Table 2: Number of heterozygous SNPs and extreme ASE events filtered per sample

| Filters <sup>a</sup>                                        | Heterozygous SNP filters |           |        | ASE event filters |           |      |
|-------------------------------------------------------------|--------------------------|-----------|--------|-------------------|-----------|------|
|                                                             | CHD WGS                  | CHD Exome | GTEX   | CHD WGS           | CHD Exome | GTEX |
| Total expressed heterozygous SNPs or preliminary ASE events | 9310.1                   | 4833.0    | 6070.9 | 31.2              | 19.1      | 21.6 |
| <i>I. Exclusion of SNPs</i>                                 |                          |           |        |                   |           |      |
| A) Low-quality genotype called SNPs                         | 1435.3                   | 465.9     | 3.2    | 3.1               | 5.0       | 3.6  |
| B) SNPs in alternatively spliced exons                      | 36.1                     | 33.0      | 40.2   | 1.6               | 0.6       | 2.0  |
| C) SNPs with expected alignment biases                      | 397.1                    | 92.6      | 100.0  | 4.1               | 1.3       | 0.9  |
| D) SNPs biased in multiple subjects                         | 27.1                     | 34.1      | 45.2   | 3.4               | 5.2       | 7.1  |
| <i>II. Exclusion of genes/RNAs</i>                          |                          |           |        |                   |           |      |
| A) Genes typically associated with ASE                      | 129.7                    | 42.1      | 34.4   | 4.4               | 3.7       | 3.7  |
| B) RNAs with misaligned reads                               | 815.1                    | 528.8     | 266.8  | 7.8               | 2.3       | 0.7  |
| C) Genes with low fetal heart expression                    | 1.7                      | 0.1       | 1.2    | 0.1               | 0.0       | 0.3  |
| D) Known imprinted genes                                    | 65.3                     | 33.6      | 55.8   | 1.8               | 0.5       | 1.3  |
| <i>III. Quality control confirmation</i>                    |                          |           |        |                   |           |      |
| A) ASE not confirmed in fastq sequencing reads              | 7.0                      | 3.8       | 6.8    | 2.3               | 0.2       | 0.8  |
| B) Visual inspection of RNAseq data in IGV                  | 1.6                      | 0.9       | 1.7    | 0.6               | 0.1       | 0.6  |
| C) Sanger sequencing                                        | 1.4                      | 0.0       | NA     | 0.6               | 0.0       | NA   |
| Total filtered SNPs or extreme ASE events                   | 2917.4                   | 1234.9    | 555.3  | 29.8              | 18.9      | 21.0 |
| Total biallelic SNPs                                        | 6388.8                   | 3596.5    | 5511.3 | NA                | NA        | NA   |
| Total passing SNPs or extreme ASE events                    | 3.9                      | 1.6       | 4.3    | 1.4               | 0.2       | 0.6  |

<sup>a</sup>Filters are described in detail in Methods

Supplementary Table 3: C57Bl6/Castaneus F1 mouse RNAseq Data

| <b>F1 hybrid</b> | <b>RNAseq Tissues</b> | <b>Unique Aligned Reads</b> | <b>Expressed Genes<sup>a</sup></b> | <b>Expressed Het SNPs (1 of 18 SNPs)<sup>b</sup></b> | <b>Expressed Genes with Het SNPs (1 of 18 SNPs)<sup>c</sup></b> |
|------------------|-----------------------|-----------------------------|------------------------------------|------------------------------------------------------|-----------------------------------------------------------------|
| C57Bl6 x CAST    | LA                    | 35355562                    | 14549                              | 99362 (9250)                                         | 12463 (6468)                                                    |
| C57Bl6 x CAST    | Liver                 | 33983102                    | 14776                              | 104377 (9593)                                        | 12765 (6665)                                                    |
| C57Bl6 x CAST    | LV                    | 33981526                    | 14196                              | 100756 (9144)                                        | 12192 (6317)                                                    |
| C57Bl6 x CAST    | PA                    | 36119922                    | 15136                              | 107543 (9818)                                        | 13102 (6817)                                                    |
| C57Bl6 x CAST    | RA                    | 33468184                    | 14667                              | 94928 (9116)                                         | 12443 (6433)                                                    |
| C57Bl6 x CAST    | RV                    | 35060410                    | 14336                              | 97199 (9116)                                         | 12317 (6380)                                                    |
| C57Bl6 x CAST    | SKM                   | 30808494                    | 15089                              | 101565 (9669)                                        | 12956 (6756)                                                    |

See Supplemental Table 1 for tissue abbreviations; SKM, Skeletal muscle

<sup>a</sup>Number of genes with expression > 2rpm (reads per million aligned reads)

<sup>b</sup>Number of heterozygous SNPs with a minimum of 1 read

<sup>c</sup>Number of genes with expression > 2rpm, containing a heterozygous SNP

Supplementary Table 4: ASE genes over-represented (>5% ASE; > 1 ASE subject) in CHD cases and/or GTEX controls

| Gene    | CHD ASE <sup>a</sup> | GTEx ASE <sup>a</sup> | % ASE | FHE <sup>b</sup> | PCGC cases LOF AF <sup>c</sup> | PCGC controls LOF AF <sup>c</sup> | ExAC LOF AF <sup>c</sup> |
|---------|----------------------|-----------------------|-------|------------------|--------------------------------|-----------------------------------|--------------------------|
| ACSM5   | 2/6                  | 1/2                   | 37.50 | 2.4              | 0                              | 1.1E-03                           | 1.9E-03                  |
| AKR1C1  | 1/11                 | 1/1                   | 16.67 | 14.8             | 1.9E-03                        | 8.3E-04                           | 8.1E-04                  |
| CECR1   | 1/94                 | 7/58                  | 5.26  | 62.0             | 0                              | 0                                 | 8.2E-05                  |
| ERAP2   | 0/5                  | 2/15                  | 10.00 | 4.52             | 3.0E-03                        | 1.9E-03                           | 2.1E-03                  |
| GLP1R   | 1/35                 | 3/29                  | 6.25  | 43.3             | 0                              | 0                                 | 1.1E-04                  |
| MRPS26  | 0/4                  | 3/11                  | 20.00 | 51.7             | 0                              | 0                                 | 9.1E-05                  |
| MYH6    | 5/17 <sup>d</sup>    | 0/0                   | 29.41 | 3646             | 7.5E-04                        | 5.6E-04                           | 6.9E-04                  |
| MYL7    | 1/16                 | 1/13                  | 6.90  | 3228             | 3.7E-04                        | 2.8E-04                           | 1.5E-04                  |
| NR1H2   | 0/15                 | 3/19                  | 8.82  | 62.6             | 0                              | 2.8E-04                           | 5.5E-05                  |
| PPP1R3A | 3/44                 | 1/22                  | 6.06  | 4.7              | 1.1E-03                        | 2.8E-03                           | 3.5E-03                  |
| PRSS50  | 1/9                  | 3/15                  | 16.67 | 17.9             | 3.7E-04                        | 0                                 | 1.3E-03                  |
| S100A12 | 0/2                  | 1/18                  | 5.00  | 3.1              | 3.7E-04                        | 0                                 | 1.8E-05                  |
| THNSL2  | 0/10                 | 1/5                   | 6.67  | 8.43             | 3.4E-03                        | 1.4E-03                           | 4.0E-03                  |
| TNNT3   | 0/29                 | 3/23                  | 5.77  | 153.7            | 3.7E-04                        | 0                                 | 5.5E-05                  |
| UQCRFS1 | 0/12                 | 4/16                  | 14.29 | 95.8             | 3.7E-04                        | 0                                 | 9.1E-06                  |
| VWDE    | 0/9                  | 1/10                  | 5.26  | 3.14             | 2.4E-02                        | 1.6E-02                           | 5.5E-03                  |

FHE, Fetal heart expression; LOF AF, Loss-of-function allele frequency

<sup>a</sup>Number of subjects with ASE /number of informative subjects

<sup>b</sup>Gene specific reads per million aligned reads

<sup>c</sup>Allele frequency for rare (MAF < 0.01), loss-of-function variants that are not alternatively spliced

<sup>d</sup>ASE observed only in extra-cardiac tissues, so 5/17 refers to just extra-cardiac tissues



Supplementary Table 5: ASE genes with low fetal heart expression

| Gene     | CHD ASE <sup>a</sup> | GTEX ASE <sup>a</sup> | % ASE  | FHE <sup>b</sup> | PCGC cases LOF AF <sup>c</sup> | PCGC controls LOF AF <sup>c</sup> | ExAC LOF AF <sup>c</sup> |
|----------|----------------------|-----------------------|--------|------------------|--------------------------------|-----------------------------------|--------------------------|
| MYH1     | 0/1                  | 2/6                   | 28.57  | 0.5              | 7.5E-03                        | 4.2E-03                           | 9.0E-03                  |
| C6       | 0/53                 | 1/72                  | 0.80   | 0.9              | 2.6E-03                        | 5.6E-04                           | 3.4E-03                  |
| PGPEP1L  | 1/4                  | 0/15                  | 5.26   | 0.6              | 3.4E-03                        | 8.3E-04                           | 3.0E-03                  |
| DMBT1    | 0/1                  | 1/1                   | 50.00  | 0.3              | 1.5E-03                        | 1.1E-03                           | 2.8E-03                  |
| LMAN1L   | 0/24                 | 1/33                  | 1.75   | 1                | 3.0E-03                        | 1.7E-03                           | 2.8E-03                  |
| CYP4F12  | 0/18                 | 1/35                  | 1.89   | 0.6              | 7.5E-04                        | 2.2E-03                           | 2.6E-03                  |
| KLKB1    | 0/23                 | 1/31                  | 1.85   | 0.2              | 1.5E-03                        | 5.6E-04                           | 2.2E-03                  |
| LCNL1    | 1/21                 | 0/27                  | 2.08   | 0.5              | 8.2E-03                        | 5.0E-03                           | 1.9E-03                  |
| DNAAF1   | 0/0                  | 1/2                   | 50.00  | 1.9              | 3.4E-03                        | 1.7E-03                           | 1.9E-03                  |
| OTOGL    | 0/20                 | 1/18                  | 2.63   | 0.7              | 1.5E-03                        | 2.5E-03                           | 1.8E-03                  |
| UGT2B4   | 1/16                 | 0/1                   | 5.88   | 0.6              | 3.7E-04                        | 5.6E-04                           | 1.4E-03                  |
| APOB     | 1/12                 | 0/41                  | 1.89   | 1.4              | 7.5E-04                        | 1.1E-03                           | 9.0E-04                  |
| CYP4F11  | 0/3                  | 1/2                   | 20.00  | 0.9              | 1.1E-03                        | 2.8E-04                           | 8.4E-04                  |
| ABCC8    | 0/26                 | 1/46                  | 1.39   | 1.6              | 3.7E-04                        | 5.6E-04                           | 7.3E-04                  |
| CYP4B1   | 0/8                  | 1/39                  | 2.13   | 0.3              | 1.1E-03                        | 5.6E-04                           | 5.9E-04                  |
| SPINK5   | 1/12                 | 0/18                  | 3.33   | 0.7              | 0                              | 5.6E-04                           | 5.3E-04                  |
| CST7     | 0/13                 | 1/34                  | 2.13   | 0.8              | 0                              | 5.6E-04                           | 4.5E-04                  |
| GRIN2C   | 0/21                 | 1/22                  | 2.33   | 1.3              | 7.5E-04                        | 0                                 | 3.1E-04                  |
| C1orf116 | 0/1                  | 1/2                   | 33.33  | 0.4              | 0                              | 5.6E-04                           | 2.4E-04                  |
| PNLIP    | 0/0                  | 1/1                   | 100.00 | 0                | 1.1E-03                        | 2.8E-04                           | 1.6E-04                  |
| C4BPA    | 0/0                  | 1/3                   | 33.33  | 0.2              | 0                              | 0                                 | 1.3E-04                  |
| CA3      | 0/20                 | 1/41                  | 1.64   | 1.2              | 0                              | 0                                 | 1.3E-04                  |
| CLEC12A  | 0/5                  | 3/17                  | 13.64  | 0.4              | 0                              | 5.6E-04                           | 1.2E-04                  |
| SSTR5    | 0/2                  | 1/28                  | 3.33   | 0                | 0                              | 2.8E-04                           | 1.2E-04                  |
| MLPH     | 2/74                 | 0/50                  | 1.61   | 1.5              | 3.7E-04                        | 2.8E-04                           | 1.1E-04                  |
| REG1A    | 0/0                  | 1/1                   | 100.00 | 0                | 0                              | 2.8E-04                           | 6.4E-05                  |
| GJD2     | 0/2                  | 1/12                  | 7.14   | 0                | 0                              | 0                                 | 4.5E-05                  |
| LOR      | 0/0                  | 1/18                  | 5.56   | 0                | 0                              | 0                                 | 2.7E-05                  |
| NPY      | 0/5                  | 1/9                   | 7.14   | 1.3              | 0                              | 0                                 | 1.8E-05                  |
| INHBB    | 0/2                  | 1/15                  | 5.88   | 0.5              | 0                              | 0                                 | 0                        |

FHE, Fetal heart expression; LOF AF, Loss-of-function allele frequency

<sup>a</sup>Number of subjects with ASE /number of informative subjects

<sup>b</sup>Gene specific reads per million aligned reads

<sup>c</sup>Allele frequency for rare (MAF < 0.01), loss-of-function variants that are not alternatively spliced

Supplementary Table 6: Genes with ASE in CHD Subjects (excluding imprinted genes)

| Blind ID | ASE Tissue(s)   | Gene     | Allele 1           |                    |      | Allele 2 |                    |                    | CHD ASE | GTEX ASE | %     | FHE <sup>d</sup>   | Tissue Specific | LOF mutation | LOF mutation         | Altered | PCGC cases | PCGC controls | ExAC |
|----------|-----------------|----------|--------------------|--------------------|------|----------|--------------------|--------------------|---------|----------|-------|--------------------|-----------------|--------------|----------------------|---------|------------|---------------|------|
|          |                 |          | reads <sup>a</sup> | reads <sup>a</sup> | SNPs | Bias     | reads <sup>a</sup> | reads <sup>a</sup> |         |          |       |                    |                 | SNPs         | allele) <sup>e</sup> |         |            |               |      |
| 1-00384  | IVS             | AARSD1   | 17                 | 33                 | 4    | 1        | 8.3                | 2.3E-03 1/29       | 0/17    | 2        | 138   |                    | 1               |              | Loss                 | 0       | 0          | 0             |      |
| 1-00618  | RA              | ACOX2    | 3                  | 36                 | 0    | 2        | ∞                  | 6.1E-08 2/60       | 0/21    | 2        | 28.5  |                    |                 |              |                      | 1.9E-03 | 2.2E-03    | 2.8E-03       |      |
| 1-04724  | LV              | ACOX2    | 3                  | 35                 | 0    | 3        | ∞                  | 1.1E-07 2/60       | 0/21    | 2        | 28.5  |                    |                 |              |                      | 1.9E-03 | 2.2E-03    | 2.8E-03       |      |
| 1-04119  | PA              | ARSA     | 22                 | 31                 | 3    | 2        | 10.3               | 1.4E-03 1/112      | 0/61    | 1        | 75.9  |                    |                 |              |                      | 3.7E-04 | 8.3E-04    | 1.0E-03       |      |
| 1-05398  | DuctArt         | ASPN     | 9                  | 44                 | 1    | 1        | 44.0               | 5.1E-09 1/10       | 0/13    | 4        | 16.9  |                    | 1               |              |                      | 3.7E-04 | 1.1E-03    | 3.5E-04       |      |
| 1-00713  | IVS,LV,RV       | C17orf97 | 17                 | 108                | 4    | 2        | 27.0               | 5.2E-24 2/12       | 0/8     | 10       | 16.8  |                    |                 |              |                      | 7.5E-04 | 8.3E-04    | 4.1E-03       |      |
| 1-01485  | RA              | C17orf97 | 17                 | 30                 | 1    | 3        | 30.0               | 6.1E-05 2/12       | 0/8     | 10       | 16.8  |                    |                 | 1            |                      | 7.5E-04 | 8.3E-04    | 4.1E-03       |      |
| 1-00713  | LV,RV           | C5orf46  | 5                  | 61                 | 5    | 1        | 12.2               | 5.3E-10 1/23       | 0/38    | 2        | 15.5  |                    |                 | Loss         | 0                    | 0       | 9.1E-05    |               |      |
| 1-00070  | IVS,LV,RA       | C7       | 5                  | 49                 | 3    | 1        | 16.3               | 1.9E-08 3/119      | 0/76    | 2        | 157   |                    | 1               |              |                      | 2.6E-03 | 5.6E-04    | 1.4E-03       |      |
| 1-01484  | AtrSpt          | C7       | 5                  | 32                 | 2    | 1        | 16.0               | 1.6E-04 3/119      | 0/76    | 2        | 157   |                    |                 |              |                      | 2.6E-03 | 5.6E-04    | 1.4E-03       |      |
| 1-01984  | LA,LV,RV        | C7       | 5                  | 76                 | 8    | 1        | 9.5                | 8.7E-12 3/119      | 0/76    | 2        | 157   | 1 (not in RA)      |                 |              |                      | 2.6E-03 | 5.6E-04    | 1.4E-03       |      |
| 1-04173  | PA              | CASQ2    | 1                  | 27                 | 0    | 3        | ∞                  | 2.7E-05 1/102      | 0/75    | 1        | 398   |                    |                 |              |                      | 3.7E-04 | 2.8E-04    | 2.5E-04       |      |
| CHD-1548 | LA,LV,RA,RV     | CBR1     | 21                 | 38                 | 1    | 1        | 38.0               | 4.0E-07 1/52       | 0/36    | 1        | 26.3  |                    |                 | Loss         | 0                    | 2.8E-04 | 2.6E-03    |               |      |
| 1-04050  | RV              | CDH13    | 16                 | 43                 | 4    | 1        | 10.8               | 6.1E-06 1/63       | 0/58    | 1        | 29.8  |                    |                 |              |                      | 0       | 0          | 9.1E-06       |      |
| 1-01021  | RA              | CKMT2    | 5                  | 426                | 47   | 1        | 9.1                | 3.2E-74 1/8        | 0/0     | 13       | 307   |                    |                 |              |                      | 0       | 5.6E-04    | 4.8E-04       |      |
| 1-04333  | RA              | CRACR2B  | 11                 | 21                 | 0    | 2        | ∞                  | 2.2E-03 1/59       | 0/55    | 1        | 20.9  |                    | 1               |              |                      | 3.7E-04 | 8.3E-04    | 5.4E-04       |      |
| 1-01620  | PV              | CTSA     | 20                 | 73                 | 3    | 1        | 24.3               | 4.9E-15 1/31       | 0/15    | 2        | 122   |                    | 1               |              |                      | 3.7E-04 | 2.8E-04    | 6.9E-04       |      |
| 1-00738  | RV              | DNAJC15  | 13                 | 26                 | 2    | 2        | 13.0               | 4.3E-03 1/46       | 0/74    | 1        | 112   |                    |                 |              |                      | 7.5E-04 | 5.6E-04    | 2.5E-04       |      |
| 1-04136  | DuctArt         | FAM118A  | 22                 | 175                | 6    | 1        | 29.2               | 5.9E-41 1/73       | 1/37    | 2        | 34.1  |                    |                 |              |                      | 7.5E-04 | 5.6E-04    | 6.4E-04       |      |
| 1-01024  | RA              | FGFBP2   | 4                  | 27                 | 2    | 2        | 13.5               | 3.5E-03 2/16       | 1/32    | 6        | 0     |                    |                 |              | Gain                 | 1.1E-03 | 5.6E-04    | 4.5E-04       |      |
| 1-01984  | IVS,LA,LV,RA,RV | FGFBP2   | 4                  | 31                 | 3    | 2        | 10.3               | 1.4E-03 2/16       | 1/32    | 6        | 0     |                    |                 | 1            | Gain                 | 1.1E-03 | 5.6E-04    | 4.5E-04       |      |
| 1-00713  | IVS,LV,RV       | FRA10AC1 | 10                 | 35                 | 1    | 2        | 35.0               | 2.3E-06 1/98       | 0/64    | 1        | 64.1  |                    |                 |              |                      | 0       | 5.6E-04    | 3.2E-04       |      |
| 1-02073  | AO              | GBP3     | 1                  | 26                 | 2    | 23       | 13.0               | 5.7E-03 1/60       | 0/53    | 1        | 3.0   |                    |                 |              |                      | 1.9E-03 | 1.9E-03    | 8.9E-03       |      |
| 1-05517  | UnkCardMsc      | GGA3     | 17                 | 33                 | 4    | 1        | 8.3                | 1.8E-03 1/28       | 0/20    | 2        | 51.3  |                    |                 |              |                      | 0       | 0          | 1.0E-04       |      |
| 1-03051  | AO              | GTF2IRD2 | 7                  | 22                 | 0    | 2        | ∞                  | 1.2E-03 1/26       | 0/0     | 4        | 10.9  |                    |                 |              |                      | 7.5E-04 | 0          | 3.5E-04       |      |
| 1-01019  | RA              | KIF1A    | 2                  | 228                | 14   | 6        | 16.3               | 1.4E-47 1/68       | 0/17    | 1        | 218   |                    |                 |              |                      | 0       | 2.8E-04    | 7.3E-05       |      |
| 1-00425  | DuctArt         | MB       | 22                 | 21                 | 0    | 2        | ∞                  | 1.7E-03 1/67       | 0/50    | 1        | 1044  |                    |                 |              |                      | 0       | 2.8E-04    | 0             |      |
| 1-01446  | RA              | MYOZ1    | 10                 | 294                | 16   | 1        | 18.4               | 4.5E-64 2/10       | 0/3     | 15       | 4.5   | 1 (not in PA)      |                 |              |                      | 0       | 2.8E-04    | 3.5E-04       |      |
| 1-02697  | RV              | MYOZ1    | 10                 | 27                 | 0    | 1        | ∞                  | 3.6E-05 2/10       | 0/3     | 15       | 4.5   | 1 (not in PV)      |                 |              | Gain                 | 0       | 2.8E-04    | 3.5E-04       |      |
| 1-01620  | PV              | PBXIP1   | 1                  | 46                 | 1    | 1        | 46.0               | 1.8E-09 1/73       | 1/64    | 1        | 113.7 |                    |                 |              |                      | 0       | 2.8E-04    | 5.7E-04       |      |
| 1-01021  | RA              | PGM1     | 1                  | 44                 | 3    | 2        | 14.7               | 4.8E-07 1/114      | 0/73    | 1        | 124   |                    | 1               |              |                      | 3.7E-04 | 0          | 6.4E-05       |      |
| 1-02845  | RA              | PRSS35   | 6                  | 85                 | 8    | 1        | 10.6               | 4.4E-14 1/30       | 0/5     | 3        | 140   |                    |                 |              |                      | 3.7E-04 | 2.8E-04    | 4.2E-04       |      |
| 1-05846  | RV              | RASGRP3  | 2                  | 62                 | 4    | 2        | 15.5               | 3.1E-11 1/67       | 0/61    | 1        | 37.6  |                    |                 |              |                      | 0       | 0          | 2.9E-04       |      |
| 1-05368  | DuctArt         | RBFOX2   | 22                 | 35                 | 1    | 1        | 35.0               | 2.1E-06 1/1        | 0/0     | 100      | 235   |                    | 1               | Loss         | 1.1E-03              | 0       | 1.8E-05    |               |      |
| 1-01024  | RA              | RETSAT   | 2                  | 62                 | 2    | 1        | 31.0               | 5.1E-13 1/22       | 0/4     | 4        | 15.8  |                    | 1               |              |                      | 7.1E-03 | 5.6E-03    | 9.7E-03       |      |
| C417-01  | IVS,LV,RA       | SDHB     | 1                  | 24                 | 1    | 1        | 24.0               | 3.8E-03 1/16       | 0/9     | 4        | 135   |                    |                 | Loss         | 0                    | 0       | 8.2E-05    |               |      |
| C417-01  | IVS,LV,RV       | SERHL2   | 22                 | 37                 | 3    | 1        | 12.3               | 4.5E-05 1/26       | 0/0     | 4        | 11.1  |                    |                 |              |                      | 9.7E-03 | 8.6E-03    | 1.6E-02       |      |
| 1-01019  | RA              | SGSM1    | 22                 | 105                | 5    | 5        | 21.0               | 5.0E-22 1/50       | 0/14    | 2        | 9.9   |                    |                 |              | Loss                 | 3.7E-04 | 0          | 9.1E-05       |      |
| 1-04606  | RA              | SLC45A2  | 5                  | 29                 | 0    | 2        | ∞                  | 7.3E-06 1/15       | 0/0     | 7        | 7.6   |                    |                 |              |                      | 1.9E-03 | 2.8E-04    | 4.5E-04       |      |
| 1-04056  | RV              | TMEM176A | 7                  | 80                 | 4    | 3        | 20.0               | 3.5E-16 1/113      | 1/70    | 1        | 35.2  |                    |                 |              |                      | 0       | 2.8E-04    | 2.7E-04       |      |
| 1-00522  | LV,RV           | TMEM176B | 7                  | 78                 | 4    | 2        | 19.5               | 1.0E-15 3/107      | 2/68    | 3        | 59.9  |                    |                 |              |                      | 3.7E-04 | 0          | 2.0E-04       |      |
| 1-01484  | AtrSpt          | TMEM176B | 7                  | 98                 | 9    | 1        | 10.9               | 1.1E-16 3/107      | 2/68    | 3        | 59.9  |                    |                 |              |                      | 3.7E-04 | 0          | 2.0E-04       |      |
| 1-04056  | RV              | TMEM176B | 7                  | 50                 | 5    | 2        | 10.0               | 3.3E-07 3/107      | 2/68    | 3        | 59.9  | 1 (not in DuctArt) |                 |              |                      | 3.7E-04 | 0          | 2.0E-04       |      |
| 1-02697  | RV              | VTN      | 17                 | 37                 | 4    | 1        | 9.3                | 2.2E-04 2/53       | 0/54    | 2        | 6.9   | 1 (not in PV)      |                 |              |                      | 1.9E-03 | 1.7E-03    | 3.5E-03       |      |
| C417-01  | IVS,LV,RV       | XRCC6BP1 | 12                 | 47                 | 5    | 1        | 9.4                | 2.9E-06 1/64       | 0/36    | 1        | 6.5   |                    |                 |              |                      | 3.7E-04 | 2.8E-04    | 1.9E-04       |      |

FHE, Fetal heart expression; LOF AF, Loss-of-function allele frequency

<sup>a</sup>Summed reads of all ASE Tissue(s)

<sup>b</sup>Pval: Binomial distribution of Allele 1 and Allele 2 reads, corrected by the number of expressed genes containing heterozygous SNPs (Supplementary Data 2)

<sup>c</sup>Number of subjects with ASE /number of informative subjects

<sup>d</sup>Gene specific reads per million aligned reads

<sup>e</sup>Subject contains loss of function mutation (Nonsense, Splice Site, Frameshift) in silenced allele

<sup>f</sup>Subject contains loss of function mutation in expressed allele

<sup>g</sup>de novo loss of function mutation identified in this gene in a different CHD subject

<sup>h</sup>Proband expression compared to mean expression for each tissue; Loss of allele expression (p < 0.05, fold < 0.65); Gain of expression (p < 0.05, fold > 5)

<sup>i</sup>Allele frequency for rare (MAF < 0.01), loss-of-function variants that are not alternatively spliced



Supplementary Table 8: Imprinted Genes that are Not ASE in Cardiovascular Tissues

| Gene       | Chr:Pos                   | CHD ASE <sup>a</sup> | GTE <sub>x</sub> ASE <sup>a</sup> | % ASE | RNA type | Expr Allele | FHE <sup>b</sup> | Mouse |
|------------|---------------------------|----------------------|-----------------------------------|-------|----------|-------------|------------------|-------|
| TP73       | chr1:3569128-3652765      | 0/3                  | 0/0                               | 0     | C        | M           | 3.6              | N/S   |
| DIRAS3     | chr1:68511644-68516481    | 6/16                 | 3/12                              | 32    | C        | P           | 6.1              | N/O   |
| LRRTM1     | chr2:80515480-80531487    | 0/14                 | 0/0                               | 0     | C        | P           | 3.9              | N/S   |
| GPR1       | chr2:207040041-207082771  | 0/9                  | 0/0                               | 0     | C        | P           | 4.3              | N/E   |
| PHACTR2    | chr6:143929316-144152322  | 0/23                 | 0/26                              | 0     | C        | M           | 69.9             | N/I   |
| IGF2R      | chr6:160390130-160527583  | 0/111                | 1/74                              | 1     | C        | M           | 114.8            | I     |
| SLC22A3    | chr6:160769424-160876014  | 0/39                 | 0/41                              | 0     | C        | M           | 4.1              | N/I   |
| MAGI2      | chr7:77646373-79082890    | 0/14                 | 0/17                              | 0     | C        | M           | 19.1             | N/I   |
| PPP1R9A    | chr7:94536948-94925727    | 0/56                 | 0/52                              | 0     | C        | M           | 24.1             | N/I   |
| TFPI2      | chr7:93515744-93520065    | 2/14                 | 0/2                               | 13    | C        | M           | 8.6              | N/I   |
| SGCE       | chr7:94214535-94285521    | 0/1                  | 0/0                               | 0     | C        | P           | 59.8             | I     |
| CPA4       | chr7:129932973-129964020  | 2/5                  | 1/5                               | 30    | C        | M           | 3.0              | N/I   |
| ZFAT       | chr8:135490030-135725292  | 1/88                 | 2/66                              | 2     | C        | P           | 13.5             | N/I   |
| GLIS3      | chr9:3824127-4300035      | 0/5                  | 0/3                               | 0     | C        | P           | 2.1              | N/I   |
| INPP5F     | chr10:121485558-121588662 | 12/54                | 1/57                              | 12    | C        | P           | 17.2             | N/I   |
| KCNQ1      | chr11:2466220-2870340     | 3/71                 | 1/53                              | 3     | C        | M           | 43.0             | N/I   |
| CDKN1C     | chr11:2904447-2906995     | 0/1                  | 0/0                               | 0     | C        | M           | 100.7            | I     |
| SLC22A18AS | chr11:2909326-2925175     | 0/1                  | 1/2                               | 33    | C        | M           | 3.4              | N/O   |
| SLC22A18   | chr11:2920950-2946476     | 3/101                | 2/62                              | 3     | C        | M           | 22.3             | N/I   |
| OSBPL5     | chr11:3108345-3187969     | 5/107                | 1/67                              | 3     | C        | M           | 29.4             | N/I   |
| WT1        | chr11:32409321-32457081   | 0/14                 | 1/30                              | 2     | C        | P           | 5.0              | N/I   |
| ANO1       | chr11:69924407-70035652   | 0/94                 | 0/66                              | 0     | C        | M           | 13.0             | N/I   |
| ZC3H12C    | chr11:109963925-110042566 | 0/12                 | 1/32                              | 2     | C        | P           | 8.2              | N/I   |
| NTM        | chr11:131240370-132206716 | 0/26                 | 0/11                              | 0     | C        | M           | 21.6             | N/I   |
| RBP5       | chr12:7276279-7281466     | 0/30                 | 0/24                              | 0     | C        | M           | 2.0              | N/O   |
| RB1        | chr13:48877882-49056026   | 0/1                  | 0/1                               | 0     | C        | M           | 15.7             | N/I   |
| UBE3A      | chr15:25582395-25684175   | 0/9                  | 0/9                               | 0     | C        | M           | 65.6             | N/I   |
| ATP10A     | chr15:25923859-26110317   | 1/74                 | 2/40                              | 3     | C        | M           | 2.1              | N/I   |
| NAA60      | chr16:3493667-3536963     | 3/70                 | 3/49                              | 5     | C        | M           | 45.8             | N/S   |
| ZNF331     | chr19:54024176-54083523   | 20/53                | 15/63                             | 30    | C        | P           | 24.2             | N/O   |
| L3MBTL1    | chr20:42136319-42179593   | 1/2                  | 0/2                               | 25    | C        | P           | 33.6             | N/E   |

C, Coding; FHE, Fetal heart expression; I, Imprinted; M, Maternal; N/E, Not expressed

N/I, Not imprinted; N/O, No mouse ortholog; N/S, No SNPs; P, Paternal

<sup>a</sup>Number of subjects with ASE /number of informative subjects

<sup>b</sup>Gene specific reads per million aligned reads

Supplementary Table 9: ASE analysis of all genes containing a rare, nonsense mutation

| Gene     | Blind ID | Chr | Pos       | Effect      | MAF     | Ref Base Reads | LOF Base Reads | Allele1 Reads <sup>a</sup> | LOF Allele Reads <sup>b</sup> | Allele Bias | Allele Pval <sup>c</sup> | LOF SNP Pval <sup>d</sup> |
|----------|----------|-----|-----------|-------------|---------|----------------|----------------|----------------------------|-------------------------------|-------------|--------------------------|---------------------------|
| ASPN     | 1-05398  | 9   | 95228784  | STOP_GAINED | 4.1E-05 | 44             | 1              | 44                         | 1                             | 44.0        | 1.28E-12                 | 1.28E-12                  |
| RBFOX2   | 1-05368  | 22  | 36155972  | STOP_GAINED | 0       | 35             | 1              | 35                         | 1                             | 35.0        | 1.05E-09                 | 1.05E-09                  |
| CTSA     | 1-01620  | 20  | 44522702  | STOP_GAINED | 0       | 73             | 3              | 73                         | 3                             | 24.0        | 9.3E-19                  | 9.30E-19                  |
| PGM1     | 1-01021  | 1   | 64100580  | STOP_GAINED | 0       | 9              | 0              | 44                         | 3                             | 15.0        | 1.15E-10                 | 0.001953                  |
| CPNE3    | 1-05799  | 8   | 87549853  | STOP_GAINED | 4.1E-05 | 13             | 1              | 24                         | 2                             | 12.0        | 4.84E-06                 | 0.000854                  |
| BCO2     | 1-00984  | 11  | 112085566 | STOP_GAINED | 5.7E-04 | 17             | 2              | 17                         | 2                             | 8.5         | 0.000326                 | 0.000326                  |
| ECH1     | 1-01399  | 19  | 39308123  | STOP_GAINED | 2.4E-04 | 17             | 2              | 17                         | 2                             | 8.5         | 0.000326                 | 0.000326                  |
| NOC2L    | 1-04943  | 1   | 889185    | STOP_GAINED | 0       | 15             | 2              | 25                         | 3                             | 8.3         | 1.22E-05                 | 0.001038                  |
| ITGA11   | 1-02664  | 15  | 68599977  | STOP_GAINED | 0       | 22             | 2              | 85                         | 12                            | 7.1         | 1.35E-14                 | 4.94E-05                  |
| EVC      | 1-02231  | 4   | 5811287   | STOP_GAINED | 8.1E-06 | 14             | 1              | 34                         | 5                             | 6.8         | 1.05E-06                 | 0.000458                  |
| FAM189A  | 1-02281  | 9   | 72003220  | STOP_GAINED | 1.2E-04 | 19             | 4              | 19                         | 4                             | 4.8         | 0.002111                 | 0.002111                  |
| FMO2     | 1-05673  | 1   | 171173121 | STOP_GAINED | 1.6E-03 | 61             | 14             | 130                        | 27                            | 4.8         | 1.82E-17                 | 2.97E-08                  |
| AS3MT    | 1-02281  | 10  | 104632959 | STOP_GAINED | 8.2E-06 | 13             | 2              | 23                         | 5                             | 4.6         | 0.000732                 | 0.006409                  |
| ASB15    | 1-04682  | 7   | 123267310 | STOP_GAINED | 7.7E-03 | 24             | 6              | 36                         | 9                             | 4.0         | 2.52E-05                 | 0.000553                  |
| BCAM     | 1-02945  | 19  | 45315576  | STOP_GAINED | 0       | 20             | 10             | 86                         | 17                            | 5.1         | 1.13E-12                 | 0.027982                  |
| SHMT1    | 1-02664  | 17  | 18243393  | STOP_GAINED | 0       | 8              | 3              | 15                         | 3                             | 5.0         | 0.009338                 | 0.241699                  |
| FASTKD1  | 1-05538  | 2   | 170387886 | STOP_GAINED | 6.9E-03 | 6              | 1              | 28                         | 6                             | 4.7         | 0.000235                 | 0.164063                  |
| ATP11B   | 1-04389  | 3   | 182602552 | STOP_GAINED | 0       | 7              | 1              | 16                         | 4                             | 4.0         | 0.004621                 | 0.062500                  |
| ZC3H13   | 1-01984  | 13  | 46538115  | STOP_GAINED | 8.1E-06 | 10             | 1              | 230                        | 59                            | 3.9         | 1.94E-25                 | 0.005371                  |
| SLC16A5  | 1-02090  | 17  | 73096839  | STOP_GAINED | 0       | 13             | 3              | 15                         | 4                             | 3.8         | 0.007393                 | 0.008545                  |
| DNAJC4   | 1-01282  | 11  | 64000046  | STOP_GAINED | 4.1E-05 | 27             | 8              | 27                         | 8                             | 3.4         | 0.000685                 | 0.000685                  |
| PI4KA    | 1-01446  | 22  | 21068776  | STOP_GAINED | 0       | 16             | 6              | 155                        | 46                            | 3.4         | 1.87E-15                 | 0.017789                  |
| SEMA6C   | CHD-1548 | 1   | 151108125 | STOP_GAINED | 2.4E-05 | 121            | 31             | 383                        | 126                           | 3.0         | 3.74E-31                 | 1.04E-13                  |
| NEDD9    | 1-03956  | 6   | 11185691  | STOP_GAINED | 0       | 1              | 4              | 7                          | 21                            | 3.0         | 0.013233                 | 0.468750                  |
| BDP1     | 1-01094  | 5   | 70811913  | STOP_GAINED | 0       | 1              | 0              | 20                         | 7                             | 2.9         | 0.006616                 | 0.500000                  |
| MYOM2    | 1-00713  | 8   | 2026918   | STOP_GAINED | 4.5E-04 | 228            | 47             | 3518                       | 1275                          | 2.8         | 1.1E-239                 | 4.37E-30                  |
| ANXA5    | 1-03185  | 4   | 122593712 | STOP_GAINED | 5.5E-04 | 51             | 18             | 51                         | 18                            | 2.8         | 2.92E-05                 | 2.92E-05                  |
| HMGCL    | 1-04737  | 1   | 24147035  | STOP_GAINED | 2.4E-05 | 3              | 3              | 17                         | 6                             | 2.8         | 0.012034                 | 0.312500                  |
| CMYA5    | 1-03973  | 5   | 79028492  | STOP_GAINED | 2.5E-05 | 11             | 2              | 486                        | 178                           | 2.7         | 1.99E-34                 | 0.009521                  |
| MCC      | 1-02626  | 5   | 112458498 | STOP_GAINED | 4.1E-05 | 13             | 5              | 13                         | 5                             | 2.6         | 0.032684                 | 0.032684                  |
| LZTR1    | 1-05368  | 22  | 21343948  | STOP_GAINED | 9.8E-05 | 12             | 5              | 25                         | 10                            | 2.5         | 0.010686                 | 0.094421                  |
| ANKRD50  | 1-02846  | 4   | 125590331 | STOP_GAINED | 0       | 2              | 0              | 19                         | 8                             | 2.4         | 0.016541                 | 0.250000                  |
| RNF213   | 1-02903  | 17  | 78333985  | STOP_GAINED | 0       | 3              | 1              | 17                         | 7                             | 2.4         | 0.020629                 | 0.250000                  |
| ANKZF1   | 1-05254  | 2   | 220100305 | STOP_GAINED | 1.6E-05 | 16             | 4              | 31                         | 13                            | 2.4         | 0.008853                 | 0.013862                  |
| ZDHH4    | 1-02883  | 7   | 6624829   | STOP_GAINED | 2.4E-05 | 13             | 5              | 24                         | 11                            | 2.2         | 0.012143                 | 0.032684                  |
| MMS19    | 1-04606  | 10  | 99237155  | STOP_GAINED | 0       | 26             | 12             | 26                         | 12                            | 2.2         | 0.00985                  | 0.009850                  |
| ASB15    | 1-00618  | 7   | 123267310 | STOP_GAINED | 7.7E-03 | 18             | 5              | 31                         | 15                            | 2.1         | 0.021817                 | 0.012034                  |
| TRIM22   | 1-02921  | 11  | 5730745   | STOP_GAINED | 4.4E-04 | 14             | 9              | 29                         | 14                            | 2.1         | 0.008911                 | 0.097417                  |
| FAM189A  | 1-00618  | 9   | 72003172  | STOP_GAINED | 0       | 43             | 21             | 45                         | 22                            | 2.0         | 0.005514                 | 0.006685                  |
| CROCC    | 1-03956  | 1   | 17257012  | STOP_GAINED | 1.9E-04 | 5              | 1              | 26                         | 13                            | 2.0         | 0.044324                 | 0.281250                  |
| MC1R     | 1-00801  | 16  | 89986122  | STOP_GAINED | 6.7E-04 | 6              | 4              | 13                         | 7                             | 1.9         | 0.073929                 | 0.205078                  |
| ERV3-1   | 1-04056  | 7   | 64453145  | STOP_GAINED | 0       | 5              | 4              | 13                         | 7                             | 1.9         | 0.073929                 | 0.246094                  |
| C1orf86  | 1-05538  | 1   | 2125193   | STOP_GAINED | 1.6E-05 | 8              | 14             | 8                          | 14                            | 1.8         | 0.228717                 | 0.228717                  |
| DNHD1    | 1-00842  | 11  | 6592054   | STOP_GAINED | 4.6E-04 | 1              | 2              | 10                         | 17                            | 1.7         | 0.12571                  | 0.750000                  |
| ZNF211   | 1-01557  | 19  | 58153465  | STOP_GAINED | 3.5E-03 | 9              | 16             | 33                         | 57                            | 1.7         | 0.00341                  | 0.060885                  |
| JMJD7-PL | 1-02073  | 15  | 42134121  | STOP_GAINED | 0       | 7              | 11             | 14                         | 24                            | 1.7         | 0.035178                 | 0.121399                  |
| KDSR     | 1-04276  | 18  | 61002545  | STOP_GAINED | 0       | 12             | 7              | 12                         | 7                             | 1.7         | 0.096107                 | 0.096107                  |
| ZNF434   | 1-05673  | 16  | 3433131   | STOP_GAINED | 0       | 12             | 7              | 12                         | 7                             | 1.7         | 0.192215                 | 0.192215                  |
| TRIM45   | 1-00425  | 1   | 117663561 | STOP_GAINED | 1.2E-03 | 8              | 3              | 14                         | 9                             | 1.6         | 0.097417                 | 0.080566                  |
| C5orf45  | 1-00596  | 5   | 179264615 | STOP_GAINED | 4.8E-04 | 10             | 11             | 15                         | 24                            | 1.6         | 0.045731                 | 0.168188                  |
| PRMT7    | 1-05589  | 16  | 68363008  | STOP_GAINED | 0       | 2              | 0              | 13                         | 8                             | 1.6         | 0.097032                 | 0.250000                  |
| DNAJC11  | 1-01382  | 1   | 6705927   | STOP_GAINED | 0       | 13             | 14             | 17                         | 26                            | 1.5         | 0.047882                 | 0.149446                  |
| TRIM45   | 1-02248  | 1   | 117663561 | STOP_GAINED | 1.2E-03 | 1              | 7              | 19                         | 28                            | 1.5         | 0.049548                 | 0.031250                  |
| UBA3     | 1-03897  | 3   | 69105371  | STOP_GAINED | 8.1E-06 | 23             | 15             | 23                         | 15                            | 1.5         | 0.056284                 | 0.056284                  |
| RABEPK   | 1-04389  | 9   | 127969843 | STOP_GAINED | 1.2E-04 | 7              | 2              | 15                         | 10                            | 1.5         | 0.097417                 | 0.140625                  |
| INCA1    | CHD-1548 | 17  | 4893541   | STOP_GAINED | 2.1E-03 | 45             | 19             | 58                         | 38                            | 1.5         | 0.030544                 | 0.001418                  |
| AEBP1    | 1-02922  | 7   | 44151907  | STOP_GAINED | 0       | 10             | 7              | 14                         | 10                            | 1.4         | 0.1169                   | 0.148376                  |

Supplementary Table 9, continued

|          |          |    |           |             |         |     |     |     |     |     |          |          |
|----------|----------|----|-----------|-------------|---------|-----|-----|-----|-----|-----|----------|----------|
| DPY19L2  | 1-03805  | 12 | 64061882  | STOP_GAINED | 1.5E-03 | 2   | 5   | 34  | 49  | 1.4 | 0.022717 | 0.164063 |
| PRTFDC1  | 1-03956  | 10 | 25138812  | STOP_GAINED | 3.1E-04 | 18  | 13  | 18  | 13  | 1.4 | 0.288132 | 0.288132 |
| DDX49    | 1-04050  | 19 | 19039030  | STOP_GAINED | 5.1E-03 | 3   | 3   | 11  | 8   | 1.4 | 0.144161 | 0.312500 |
| ATF7IP2  | 1-05538  | 16 | 10574766  | STOP_GAINED | 7.1E-04 | 3   | 4   | 11  | 15  | 1.4 | 0.345386 | 0.820313 |
| IQGAP2   | C417-01  | 5  | 75964611  | STOP_GAINED | 0       | 1   | 1   | 17  | 12  | 1.4 | 0.096664 | 0.500000 |
| MAP3K6   | 1-05453  | 1  | 27683163  | STOP_GAINED | 3.3E-05 | 8   | 11  | 20  | 26  | 1.3 | 0.079698 | 0.144161 |
| C11orf21 | 1-05846  | 11 | 2321829   | STOP_GAINED | 5.1E-03 | 3   | 4   | 11  | 14  | 1.3 | 0.132841 | 0.273438 |
| ACAD10   | 1-02697  | 12 | 112167654 | STOP_GAINED | 2.0E-04 | 12  | 10  | 12  | 10  | 1.2 | 0.308345 | 0.308345 |
| CLK2     | 1-04652  | 1  | 155238112 | STOP_GAINED | 0       | 14  | 12  | 14  | 12  | 1.2 | 0.143911 | 0.143911 |
| ABTB1    | 1-05445  | 3  | 127396573 | STOP_GAINED | 3.9E-03 | 10  | 8   | 10  | 8   | 1.2 | 0.166924 | 0.166924 |
| ABCC8    | 1-00618  | 11 | 17434263  | STOP_GAINED | 5.7E-05 | 10  | 9   | 10  | 9   | 1.1 | 0.528591 | 0.528591 |
| C5orf45  | 1-00842  | 5  | 179280392 | STOP_GAINED | 2.6E-03 | 11  | 10  | 11  | 10  | 1.1 | 0.336376 | 0.336376 |
| CMBL     | 1-02697  | 5  | 10280729  | STOP_GAINED | 9.3E-04 | 6   | 6   | 12  | 11  | 1.1 | 0.322361 | 0.451172 |
| BCO2     | 1-02726  | 11 | 112085566 | STOP_GAINED | 5.7E-04 | 5   | 5   | 14  | 13  | 1.1 | 0.149446 | 0.246094 |
| SLC27A3  | 1-02920  | 1  | 153750338 | STOP_GAINED | 2.5E-04 | 12  | 11  | 12  | 11  | 1.1 | 0.16118  | 0.161180 |
| CISH     | 1-05254  | 3  | 50645538  | STOP_GAINED | 1.6E-05 | 10  | 7   | 25  | 22  | 1.1 | 0.316204 | 0.445129 |
| SIGLEC1  | 1-05254  | 20 | 3687141   | STOP_GAINED | 9.9E-03 | 2   | 1   | 10  | 9   | 1.1 | 0.528591 | 1.125000 |
| MLKL     | 1-05517  | 16 | 74708900  | STOP_GAINED | 1.6E-04 | 20  | 19  | 20  | 19  | 1.1 | 0.125371 | 0.125371 |
| ZNF30    | CHD-1548 | 19 | 35435364  | STOP_GAINED | 8.1E-06 | 10  | 11  | 10  | 11  | 1.1 | 0.504564 | 0.504564 |
| FAM118A  | 1-02664  | 22 | 45728582  | STOP_GAINED | 0       | 148 | 152 | 148 | 152 | 1.0 | 0.134461 | 0.134461 |
| MAST4    | 1-04333  | 5  | 66461716  | STOP_GAINED | 0       | 5   | 6   | 13  | 13  | 1.0 | 0.154981 | 0.225586 |

LOF, Loss-of-function; MAF, Minor allele frequency

<sup>a</sup>Summed reads for allele not containing LOF mutation

<sup>b</sup>Summed reads for allele containing LOF mutation

<sup>c</sup>Pval: Binomial distribution of Allele 1 and Allele 2 reads, corrected by the number of expressed genes (per sample) containing heterozygous nonsense mutations

<sup>d</sup>Pval: Binomial distribution of LOF SNP reads, corrected by the number of expressed genes (per sample) containing heterozygous nonsense mutations

Variants above black line are considered ASE genes (Allele bias > 4; Allele Pval and LOF SNP Pval both < 0.01)

Supplementary Table 10: Quantitative PCR confirmation of biallelic loss of expression

| <b>Blind ID</b> | <b>Tissue</b> | <b>Gene</b> | <b><math>\Delta\Delta Ct</math></b> | <b>p-value</b>         |
|-----------------|---------------|-------------|-------------------------------------|------------------------|
| 1-03051         | AO            | LBH         | 2.63                                | 4.40x10 <sup>-11</sup> |
| 1-03316         | AO            | ZBTB16      | 3.52                                | 1.29x10 <sup>-9</sup>  |
| 1-04119         | PA            | FRG1B       | 1.63                                | 9.53x10 <sup>-5</sup>  |
| 1-00596         | RA            | PHKG1       | 4.09                                | 1.83x10 <sup>-7</sup>  |
| 1-02921         | RV            | IRX5        | 1.71                                | 0.005                  |
| 1-02921         | RV            | TRMT2B      | 8.64                                | 4.56x10 <sup>-10</sup> |

Supplementary Table 11: RTL1 maternally expressed in cardiovascular tissues

| <b>Blind ID</b>                                  | <b>Num SNPs</b> | <b>Maternal RTL1<br/>allele reads<sup>a</sup></b> | <b>Paternal RTL1<br/>allele reads<sup>a</sup></b> |
|--------------------------------------------------|-----------------|---------------------------------------------------|---------------------------------------------------|
| 1-00801                                          | 1               | 1                                                 | 0                                                 |
| 1-01119                                          | 1               | 1                                                 | 0                                                 |
| 1-02073                                          | 1               | 2                                                 | 0                                                 |
| 1-02812                                          | 1               | 1                                                 | 0                                                 |
| 1-02829                                          | 3               | 4                                                 | 0                                                 |
| 1-02969                                          | 2               | 2                                                 | 0                                                 |
| 1-03948                                          | 1               | 1                                                 | 0                                                 |
| 1-04056                                          | 1               | 1                                                 | 0                                                 |
| 1-04119                                          | 1               | 2                                                 | 0                                                 |
| 1-04173                                          | 1               | 1                                                 | 0                                                 |
| 1-04276                                          | 1               | 1                                                 | 0                                                 |
| 1-04389                                          | 1               | 1                                                 | 0                                                 |
| 1-04652                                          | 2               | 4                                                 | 0                                                 |
| 1-04947                                          | 1               | 1                                                 | 0                                                 |
| 1-05476                                          | 3               | 5                                                 | 0                                                 |
| 1-05517                                          | 1               | 5                                                 | 0                                                 |
| 1-05538                                          | 1               | 1                                                 | 0                                                 |
| CHD-1548                                         | 1               | 10                                                | 0                                                 |
| <sup>a</sup> Summed reads of all proband tissues |                 |                                                   |                                                   |



Supplementary Table 12: Quantitative PCR primers for confirmation of biallelic loss of expression

| <b>Gene</b> | <b>Primer1</b>           | <b>Primer2</b>          |
|-------------|--------------------------|-------------------------|
| LBH         | CAGTCAGTCCAGGTTGACCC     | ATGAACCACTCTCTGCAGCC    |
| ZBTB16      | GATTTGCTAACCTCGCAGCAG    | ACCATGATGACCACATCGCA    |
| FRG1B       | CCACACAAAGAAGAATCGCCC    | TGTCCCCTGCTTCATTGCAT    |
| PHKG1       | GGGCACCCCAACATCATACA     | GTCCACCTCTTTCCCGTAGC    |
| IRX5        | AGCATCTTGGCAGGACCTTT     | GGCTGGTACAAGTAGCCCTG    |
| TRMT2B      | CCGCCTCAGAAACTCCCTAC     | AGGGAAGCAGTCCTGGTTTG    |
| ACTB        | CGCCGCCAGCTCACCATG       | CACGATGGAGGGGAAGACGG    |
| GAPDH_1     | CCCTTCATTGACCTCAACTACATG | TGGGATTTCCATTGATGACAAGC |
| GAPDH_2     | ACAGTCCATGCCATCACTGCC    | GCCTGCTTCACCACCTTCTTG   |
| GUSB        | ATCGCCATCAACAACACA       | CTTGGGATACTTGGAGGTG     |
| PPIA        | GAGGAAAACCGTGTACTATTAGC  | GGGACCTTGTCTGCAAAC      |
